# Supplementary material for: Fabrication of Fresnel plates on optical fibres by FIB milling for optical trapping, manipulation and detection of single cells
Source: PubMed Central journal article supplement (PMC5493682; doi:10.1038/s41598-017-04490-2), 2017-06-30
Supplement: 41598_2017_4490_MOESM1_ESM.pdf [file 41598_2017_4490_MOESM1_ESM.pdf]

## Supplementary Information

### **Fabrication of Fresnel plates on optical fibres by FIB milling for optical trapping, manipulation and detection of single cells**

Rita S. Rodrigues Ribeiro,<sup>1,2\*</sup> Pabitra Dahal,<sup>2</sup> Ariel Guerreiro,<sup>1</sup> Pedro A. S. Jorge<sup>1</sup> and Jaime Viegas<sup>2</sup>

<sup>1</sup>INESC TEC, Rua do Campo Alegre, 687, Porto, Portugal and Departamento de Física e Astronomia, Faculdade de Ciências, Universidade do Porto, Rua Campo Alegre, 687, Porto, Portugal

<sup>2</sup> Masdar Institute of Science and Technology, PO BOX 54224, Abu Dhabi, United Arab Emirates

[\\*arsr@inescporto.pt](mailto:arsr@inescporto.pt)

Video 1 Legend - Optical trapping of an 8  $\mu\text{m}$  PMMA particle in the xy plane.

Video 2 Legend - Rearrangement/sorting of two yeast cells, A and B, to a specific location.
